# Supplementary material for: The In Vivo Net Energy Content of Resistant Starch and Its Effect on Macronutrient Oxidation in Healthy Adults
Source: MDPI journal article supplement (doi:10.3390/nu11102484), 2019-10-16
Supplement: s1 [file s1]

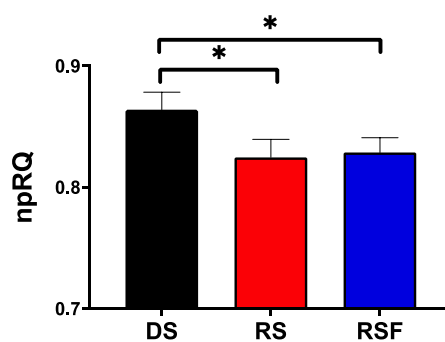

**Supplementary Figure 1.** Non-protein Respiratory Quotient (npRQ). 24 h npRQ, following consumption of digestible starch (DS), resistant starch (RS), or resistant starch with high fiber (RSF), as measured by whole-room indirect calorimetry. Data are expressed mean ± SEM; \*  $p < 0.05$ .
